# Supplementary material for: Effects of receptor for advanced glycation endproducts on microvessel formation in endometrial cancer
Source: PubMed Central journal article supplement (PMC4751660; doi:10.1186/s12885-016-2126-3), 2016-02-12

Kaplan-Meier analysis of overall survival for endometrial cancer patients

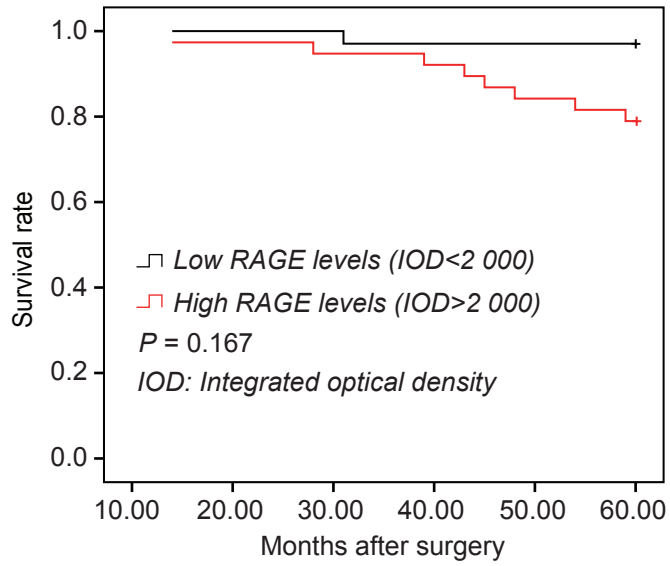

Supplement: 12885_2016_2126_MOESM2_ESM.pdf [file 12885_2016_2126_MOESM2_ESM.pdf]
